# Supplementary material for: Protective Effects of Dinitrosyl Iron Complexes under Oxidative Stress in the Heart
Source: Hindawi journal article supplement (doi:10.1155/2017/9456163), 2017-01-01
Supplement: f1 [file 9456163.f1.pdf]

## Supplemental figures

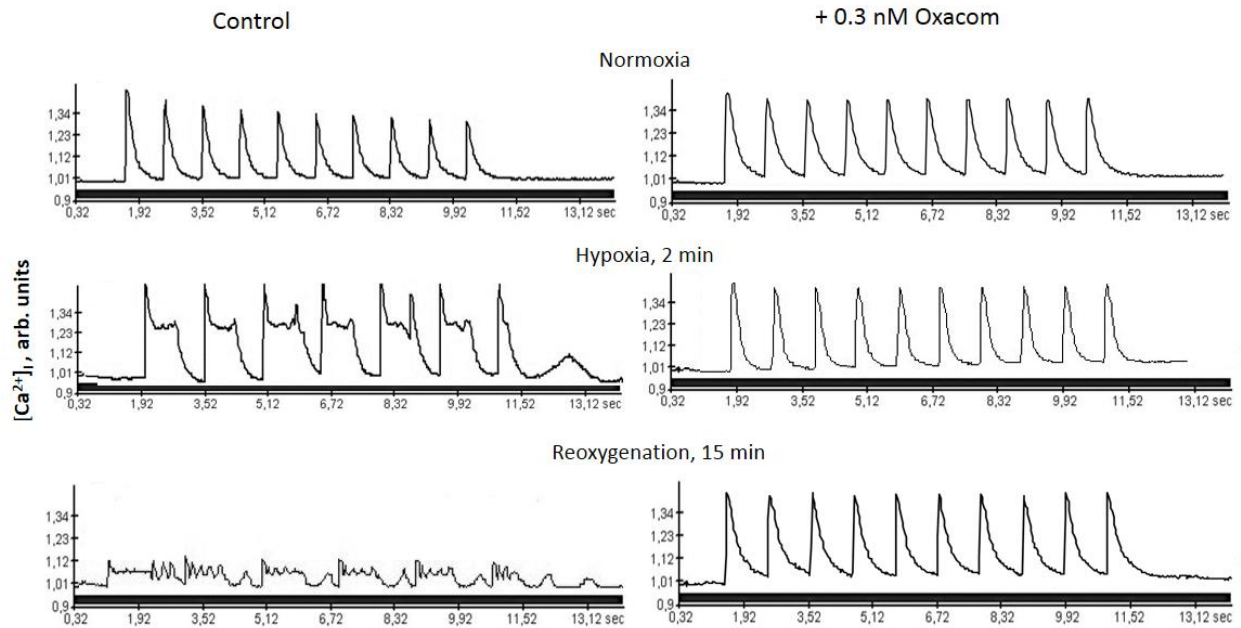

Figure S1. Effects of Oxacom on  $Ca^{2+}$  transients in isolated adult rat cardiomyocytes subjected to hypoxia-reoxygenation.

Cardiomyocytes loaded with fluo-4 were preincubated with 0.3 nM Oxacom for 30 min and electrostimulated by ten rectangular pulses at 1 Hz under conditions of normoxia, after 2 min of hypoxia produced by exchanging regular perfusion buffer saturated with carbogen (95%  $O_2$ , 5%  $CO_2$ ) for hypoxic buffer saturated with 95%  $N_2$ , 5%  $CO_2$ ; and then after 15 min of reoxygenation. Typical recordings are shown. The legend for ordinate on the left applies to all graphs.

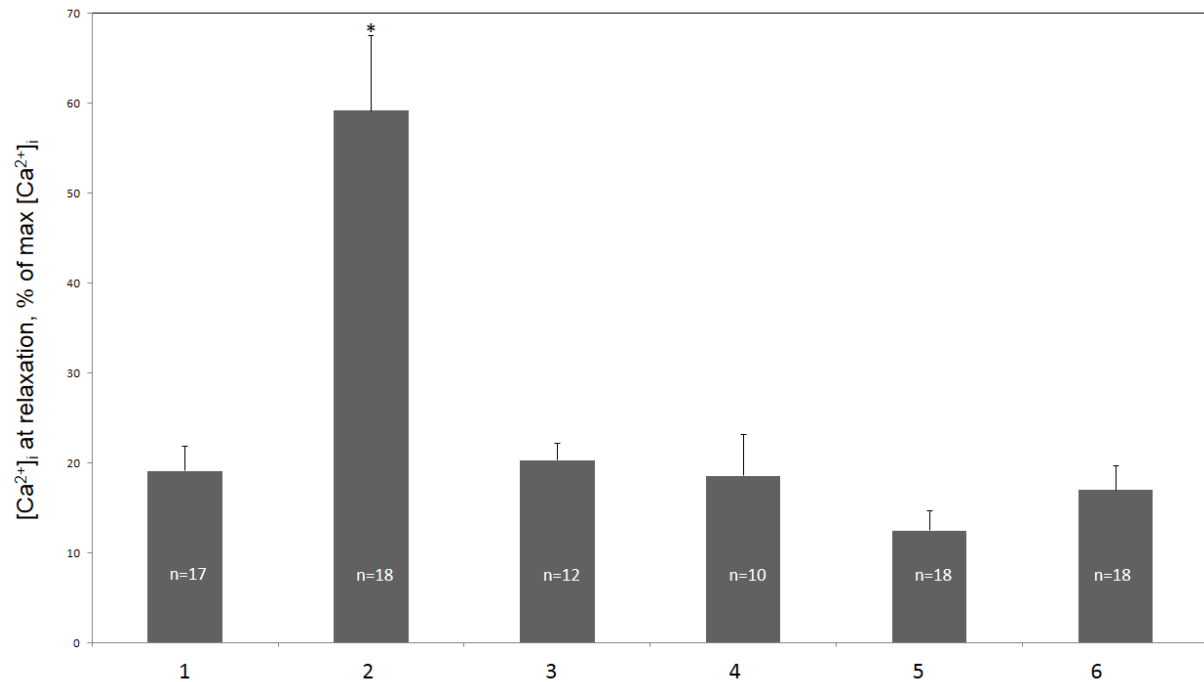

Figure S2. Quantitation of Oxacom effects on  $\text{Ca}^{2+}$  levels at relaxation in isolated adult rat cardiomyocytes subjected to hypoxia-reoxygenation.

1, control (normoxia); 2, hypoxia, 2 min; 3, hypoxia + 30 nM Oxacom, 2 min; 4, reoxygenation + 30 nM Oxacom, 15 min; 5, hypoxia + 0.3 nM Oxacom, 2 min; 6, reoxygenation + 0.3 nM Oxacom, 15 min. n, number of cells for each condition. Mean+s.d.

\*  $p < 0.01$  2 vs 1,3,4,5,6.
